# Supplementary material
Source: PubMed Central journal article supplement (PMC6606879)
Supplement: AEM.00493-19-s0001.pdf [file AEM.00493-19-s0001.pdf]

**Supplemental Material**

**Direct Cell Mass Measurements Expand the Role of Small Microorganisms in Nature**

Alexander Khachikyan<sup>a</sup>, Jana Milucka<sup>a#</sup>, Sten Littmann<sup>a</sup>, Soeren Ahmerkamp<sup>a,b</sup>, Travis Meador<sup>b,c</sup>, Martin Könneke<sup>b</sup>, Thomas Burg<sup>d</sup> and Marcel M. M. Kuypers<sup>a</sup>

<sup>a</sup>Department of Biogeochemistry, Max Planck Institute for Marine Microbiology, Bremen, Germany

<sup>b</sup>MARUM Research Faculty and Department of Geoscience, University of Bremen, Bremen, Germany

<sup>c</sup>Biology Centre, Czech Academy of Sciences, Ceske Budejovice, Czechia

<sup>d</sup>Biological Micro- and Nanotechnology, Max Planck Institute for Biophysical Chemistry, Göttingen, Germany

Running Head: Revised Mass of Small Microorganisms

#Address correspondence to Jana Milucka, [jmilucka@mpi-bremen.de](mailto:jmilucka@mpi-bremen.de)

Keywords: carbon content, microorganisms, microbial biomass, subsurface, bacterioplankton

## **Supplementary Methods**

### **Volumetric measurements of living cells with atomic force microscopy (AFM)**

Living cells of *Formosa* sp. were imaged in an aquatic environment (i.e. growth medium HaHa100V) with AFM (NT-MDT, Eindhoven, The Netherlands) using silicon nitride probe (Scanasyt-fluid+, Bruker, Karlsruhe, Germany). The spring constant of the sharp AFM probes (2 nm curvature radius) ranged from 0.35 to 1.4 N/m. Cells were imaged at room temperature using the Hybrid method. Data was acquired and processed using the software Nova\_Px 3.1.0.0 (NT-MDT, Eindhoven, Netherlands). Cell volumes were calculated by applying watershed algorithm to 3D AFM scans.

### **Dry mass measurements of living cells with suspended microchannel resonator (SMR)**

Mass measurements of living cells of *Muricauda* sp. were conducted as follows. Living cells of *Muricauda* sp. were transferred from their incubation vial (Hungate tube) into Eppendorf tubes in which they were subsequently centrifuged (3000 g, 5 min). The pellet was resuspended in deuterium oxide-based marine broth and the cell suspension was used for SMR mass measurements. The data were collected and processed as described in main text.

**Supplementary Table****Table S1. Overview of median volumes (including SE) and the variability (in %) for all measured prokaryotic species.**

The variability in the cellular biovolume (in %) was defined as standard error (SE) over the

median and calculated according to the formula: variability =  $\frac{SE}{MEDIAN} \times 100\%$  .

| Strain name                           | Median V ( $\mu\text{m}^3$ ) | Standard error V ( $\mu\text{m}^3$ ) | Variability (%) |
|---------------------------------------|------------------------------|--------------------------------------|-----------------|
| <i>Nitrosopumilus</i> sp.             | 0.011                        | 0.001                                | 11              |
| <i>Formosa</i> sp.                    | 0.023                        | 0.002                                | 12              |
| <i>Lentimonas</i> sp.                 | 0.025                        | 0.005                                | 5               |
| <i>Muricauda</i> sp.                  | 0.042                        | 0.002                                | 21              |
| <i>Maribacter</i> sp.                 | 0.065                        | 0.005                                | 13              |
| <i>Cellulophaga</i> sp.               | 0.097                        | 0.005                                | 19              |
| <i>Lacinutrix</i> sp.                 | 0.106                        | 0.006                                | 18              |
| <i>Methyloceanibacter methanicus</i>  | 0.119                        | 0.005                                | 23              |
| <i>Methyloceanibacter caenitepidi</i> | 0.145                        | 0.008                                | 18              |
| <i>Nitrotoga fabula</i>               | 0.166                        | 0.006                                | 28              |
| <i>Kuenenia stuttgartiensis</i>       | 0.238                        | 0.008                                | 30              |
| <i>Methyloceanibacter stevinii</i>    | 0.705                        | 0.035                                | 20              |

## Supplementary Figures

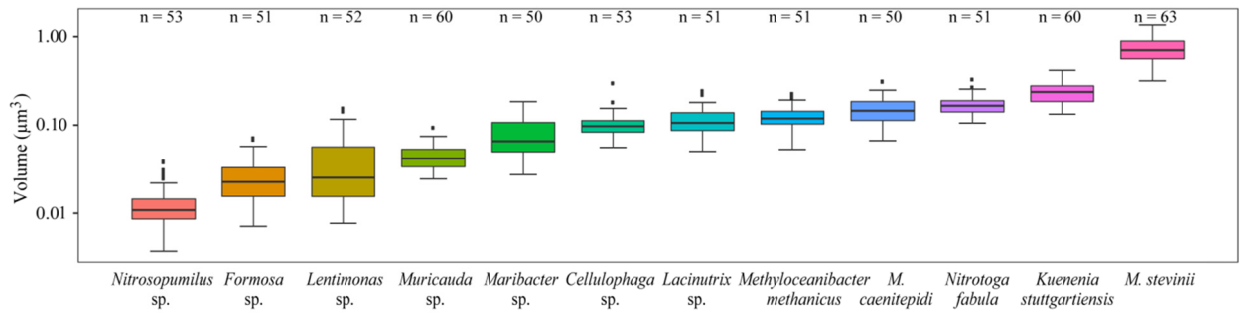

**Fig. S1. Volume distributions of twelve investigated bacterial and archaeal species calculated from scanning electron micrographs (Figure 1).** The volume distributions were estimated as described in the Materials and Methods and presented in forms of boxes indicating the 25<sup>th</sup> and 75<sup>th</sup> percentiles; error bars represent 10<sup>th</sup> and 90<sup>th</sup> percentiles, the lines indicate median volumes, outliers are displayed as dots. Color coding of the individual box plots corresponds to the color coding of the investigated species outlined in Figure 2. The number (n) of measured individual cells is specified above each box. The y-axis represents log-scale of volumes expressed in  $\mu\text{m}^3$ .

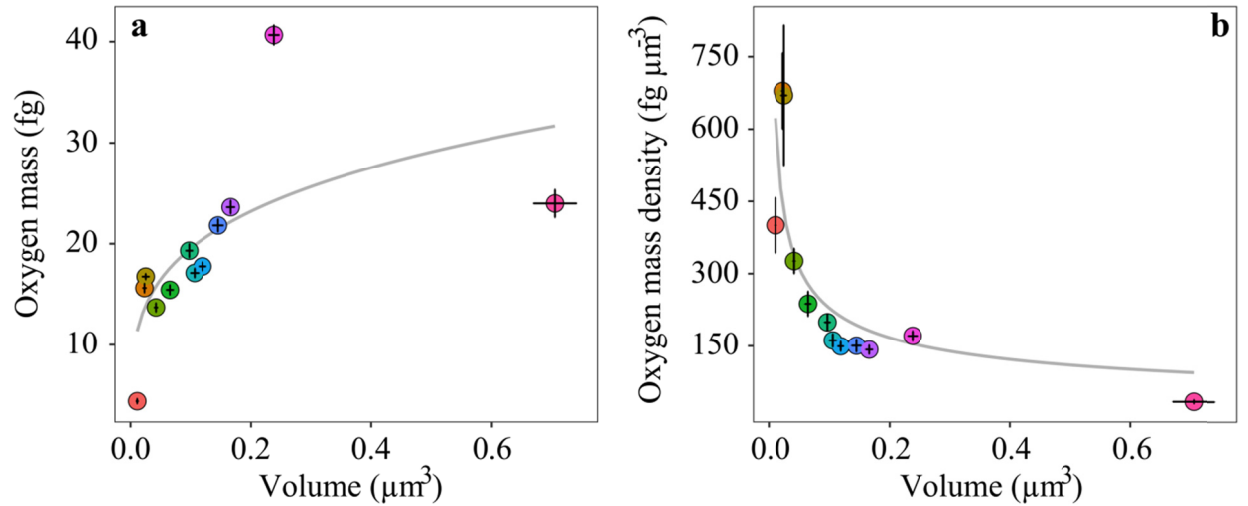

**Fig. S2. Oxygen mass scaling to cellular volume for the investigated bacterial and archaeal species.** Displayed is (a) the weak nonlinear relationship between cellular volume and oxygen mass ( $R^2 = 0.48$ ), and (b) the significant (Chi-square ANOVA,  $P < 0.05$ ) nonlinear relationship between cellular volume and oxygen mass density (oxygen mass per unit cell volume,  $R^2 = 0.62$ ). The grey lines represent best fits, described by the equations:  $m_{\text{oxygen}} = 35 \times V^{0.25}$  and  $\rho_{m_{\text{oxygen}}} = 80 \times V^{-0.45}$ , where  $m_{\text{oxygen}}$ ,  $\rho_{m_{\text{oxygen}}}$ , and  $V$  are oxygen mass in fg, oxygen mass density in  $\text{fg}/\mu\text{m}^3$  and volume in  $\mu\text{m}^3$  respectively. Error bars indicate standard error.

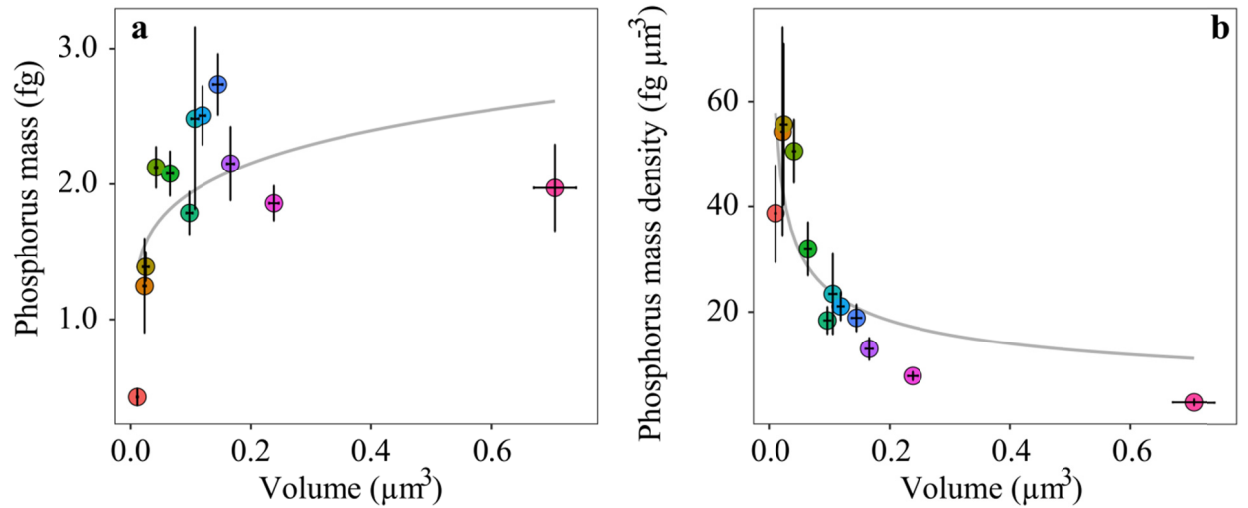

**Fig. S3. Phosphorus mass scaling to cellular volume for the investigated bacterial and archaeal species.** Displayed is (a) the weak nonlinear relationship between cellular volume and phosphorus mass ( $R^2 = 0.35$ ), and (b) the significant (Chi-square ANOVA,  $P < 0.005$ ) nonlinear relationship between cellular volume and phosphorus mass density (phosphorus mass per unit cell volume,  $R^2 = 0.66$ ). The grey lines represent best fits, described by the equations:  $m_{\text{phosphorus}} = 2.8 \times V^{0.15}$ ,  $\rho_{m_{\text{phosphorus}}} = 10 \times V^{-0.4}$ , where  $m_{\text{phosphorus}}$ ,  $\rho_{m_{\text{phosphorus}}}$ , and  $V$  are phosphorus mass in fg, phosphorus mass density in  $\text{fg}/\mu\text{m}^3$  and volume in  $\mu\text{m}^3$  respectively. Error bars indicate standard error.

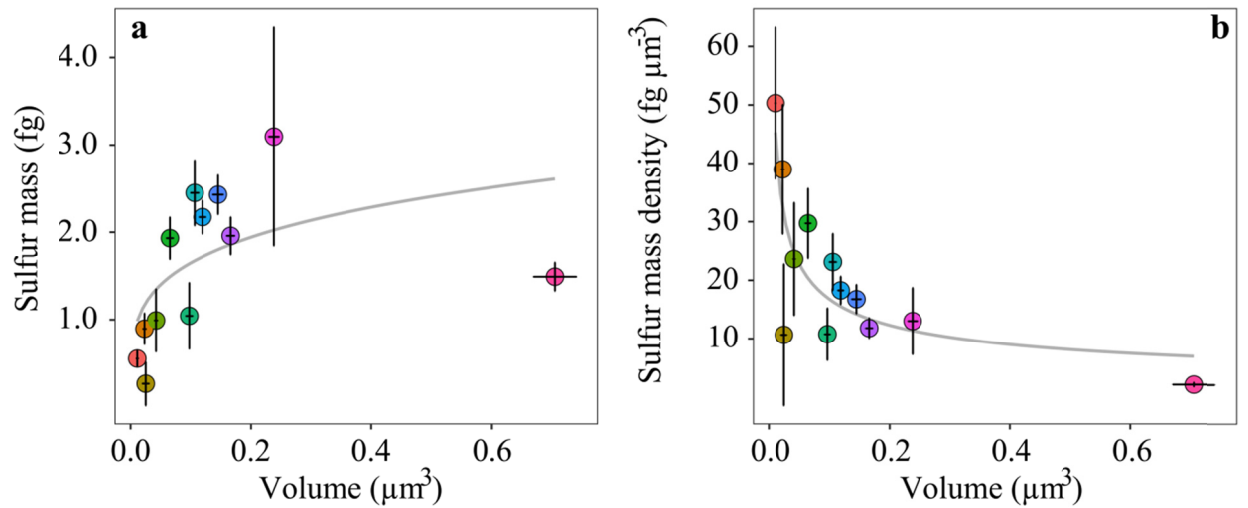

**Fig. S4. Sulfur mass scaling to cellular volume for the investigated bacterial and archaeal species.** Displayed is (a) the weak nonlinear relationships between cellular volume and sulfur mass ( $R^2 = 0.35$ ), and (b) the significant (Chi-square ANOVA,  $P < 0.05$ ) nonlinear relationship between cellular volume and sulfur mass density (sulfur mass per unit cell volume,  $R^2 = 0.65$ ) for bacterial/archaeal species. The grey lines represent best fits, described by the equations:  $m_{sulfur} = 2.8 \times V^{0.24}$ ,  $\rho_{m\_sulfur} = 6 \times V^{-0.45}$ , where  $m_{sulfur}$ ,  $\rho_{m\_sulfur}$ , and  $V$  are sulfur mass in fg, sulfur mass density in  $\text{fg}/\mu\text{m}^3$  and volume in  $\mu\text{m}^3$  respectively. Error bars indicate standard error.

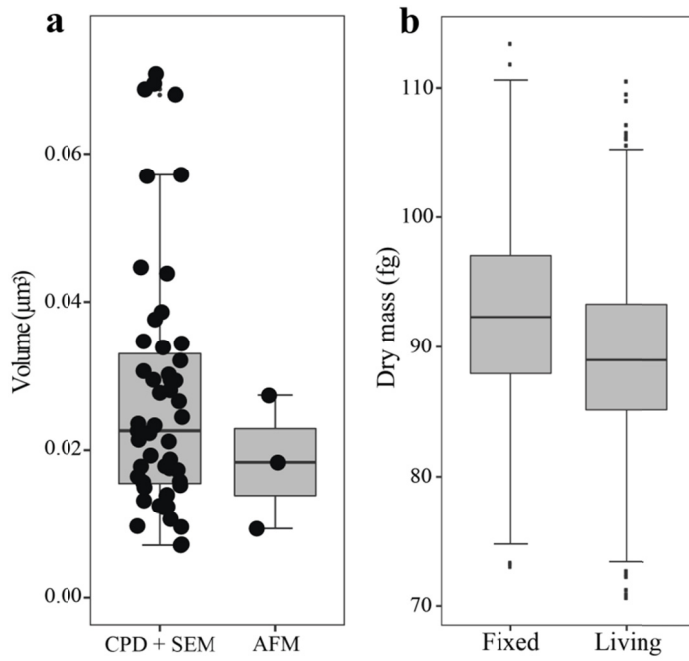

**Fig. S5. Comparison of cell volume (a) and dry mass (b) between living and fixed cells. (a)** Displayed is the range of cell volumes determined for *Formosa* sp. measured on fixed, CPD-dried and SEM-images cells (n=50) compared to live, hydrated, AFM-imaged cells (n=3). **(b)** Shown is the range of cell dry mass determined for *Muricauda* sp. when measured on fixed (n ~ 1000) and living (n ~ 1000) cells.
